# Supplementary material
Source: PubMed Central journal article supplement (PMC6236938)
Supplement: kwx038_bedard_web_material_final.pdf [file kwx038_bedard_web_material_final.pdf]

# **Time-Dependent Associations Between Body Composition, Physical Activity, and Current Asthma in Women: A Marginal Structural Modeling Analysis**

Annabelle Bédard<sup>1,2</sup>, Ignasi Serra<sup>3,4,5</sup>, Oriane Dumas<sup>1,2</sup>, Xavier Basagaña<sup>3,4,5</sup>, Françoise Clavel-Chapelon<sup>6,7</sup>, Nicole Le Moual<sup>1,2</sup>, Margaux Sanchez<sup>1,2</sup>, Valérie Siroux<sup>8,9,10</sup>, Raphaëlle Varraso<sup>1,2</sup>, Judith Garcia-Aymerich<sup>3,4,5</sup>

<sup>1</sup> INSERM U1168, Aging and Chronic Diseases: Epidemiological and Public Health Approaches (VIMA), 16 avenue Paul Vaillant Couturier, F-94807, Villejuif, France

<sup>2</sup> UVSQ, UMR-S 1168, Université Versailles St.-Quentin-en-Yvelines, Montigny le Bretonneux, France

<sup>3</sup> Centre for Research in Environmental Epidemiology (CREAL), Barcelona, Spain

<sup>4</sup> Universitat Pompeu Fabra, Barcelona, Spain

<sup>5</sup> CIBER en Epidemiologia y Salud Pública (CIBERESP), Barcelona, Spain

<sup>6</sup> INSERM, Centre for Research in Epidemiology and Population Health (CESP), U1018, “Mode de vie, gènes et santé: épidémiologie intégrée trans-générationnelle” Team, Gustave Roussy Institute, F-94805, Villejuif, France

<sup>7</sup> Université Paris Sud, UMRS 1018, F-94807, Villejuif, France

<sup>8</sup> Université Grenoble Alpes, Institut Albert Bonniot, Team of Environmental Epidemiology Applied to Reproduction and Respiratory Health, F-38000 Grenoble, France

<sup>9</sup> INSERM, Institut Albert Bonniot, Team of Environmental Epidemiology Applied to Reproduction and Respiratory Health, F-38000 Grenoble, France

<sup>10</sup> Centre Hospitalier Universitaire de Grenoble, Institut Albert Bonniot, Team of Environmental Epidemiology Applied to Reproduction and Respiratory Health, F-38000 Grenoble, France

**Web Figure 1.** Selection of the study population, Asthma-E3N Study, 2000–2011. E3N, Etude Epidémiologique auprès de Femmes de la Mutuelle Générale de l'Education Nationale.

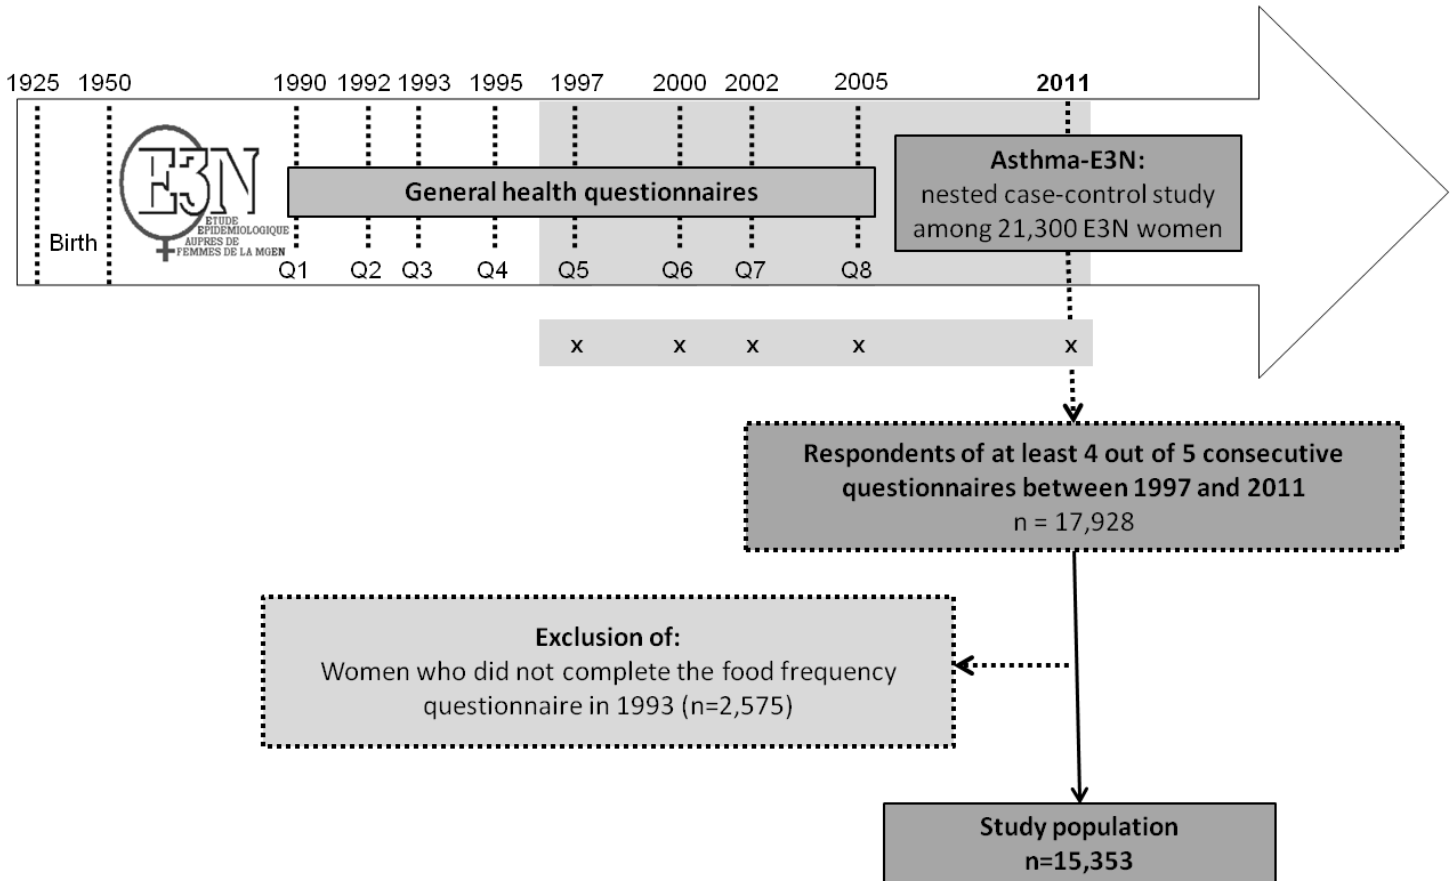

**Web Table 1.** Comparison of excluded women with included women, Asthma-E3N Study, 2000–2011

|                                                        | <b>Included<br/>(n = 15,353)</b> | <b>Excluded<br/>(n = 5,947)</b> | <b>P Value*</b> | <b>P Value**</b> |
|--------------------------------------------------------|----------------------------------|---------------------------------|-----------------|------------------|
| Age (years)†, mean (SD)                                | 59.2 (6.3)                       | 59.4 (6.5)                      | 0.03            | —                |
| BMI (weight (kg)/height (m) <sup>2</sup> )†, mean (SD) | 23.7 (3.7)                       | 24.3 (4.1)                      | <0.0001         | <0.0001          |
| BMI, % †                                               |                                  |                                 |                 |                  |
| <20.0                                                  | 12.2                             | 10.7                            |                 |                  |
| 20.0–24.9                                              | 58.2                             | 53.9                            | <0.0001         | <0.0001          |
| 25.0–29.9                                              | 23.5                             | 26.3                            |                 |                  |
| ≥30.0                                                  | 6.2                              | 9.2                             |                 |                  |
| Physical activity (MET-hours/week)†, mean (SD)         | 71.1 (39.3)                      | 69.6 (41.9)                     | 0.05            | 0.07             |
| Years of education, %                                  |                                  |                                 |                 |                  |
| <12                                                    | 10.7                             | 18.1                            |                 |                  |
| 12–14                                                  | 51.2                             | 48.2                            | <0.0001         | <0.0001          |
| 15–16                                                  | 19.0                             | 17.5                            |                 |                  |
| ≥17                                                    | 19.2                             | 16.1                            |                 |                  |
| Smoking status, % †                                    |                                  |                                 |                 |                  |
| Nonsmoker                                              | 52.5                             | 52.5                            |                 |                  |
| Past smoker                                            | 39.0                             | 35.9                            | <0.0001         | <0.0001          |
| Current smoker                                         | 8.5                              | 11.6                            |                 |                  |
| Postmenopausal women, % †                              | 89.9                             | 91.7                            | 0.0002          | <0.0001          |
| Use of HRT among postmenopausal women, % †             | 76.9                             | 69.6                            | <0.0001         | <0.0001          |
| Ever asthma, % †                                       | 22.7                             | 24.6                            | 0.009           | 0.02             |

E3N, Etude Epidémiologique auprès de Femmes de la Mutuelle Générale de l'Education Nationale; HRT, hormone replacement therapy; MET, metabolic equivalent of task; SD, standard deviation.

\* Chi-squared tests were conducted for categorical variables, and *t* tests were conducted for continuous variables.

\*\* *P* value after adjustment for age. Logistic regression models were used for categorical variables, and generalized linear models were used for continuous variables.

† Women were compared based on their characteristics assessed in 2000 (questionnaire 6).
